# Supplementary material
Source: PubMed Central journal article supplement (PMC7502196)
Supplement: NIHMS1625907-supplement-Supplementary_Data.pdf [file NIHMS1625907-supplement-Supplementary_Data.pdf]

## **Whole genome sequencing reveals complex chromosome rearrangement disrupting *NIPBL* in infant with Cornelia de Lange syndrome**

Morasha Plessner Duvdevani,<sup>1,\*</sup> Maria Pettersson,<sup>2,\*</sup> Jesper Eisfeldt,<sup>2,3</sup> Ortal Avraham,<sup>1</sup> Judith Dagan,<sup>1</sup> Ayala Frumkin,<sup>1</sup> James R. Lupski,<sup>4,5,6,7</sup> Anna Lindstrand,<sup>2,8</sup> Tamar Harel<sup>1</sup>

1. Department of Genetic and Metabolic Diseases, Hadassah-Hebrew University Medical Center, Jerusalem, Israel 9112001
2. Department of Molecular Medicine and Surgery, Center for Molecular Medicine, Karolinska Institute, Stockholm, Sweden
3. Science for Life Laboratory, Karolinska Institutet Science Park, Solna, Sweden
4. Department of Molecular and Human Genetics, Baylor College of Medicine, Houston, TX, USA
5. Human Genome Sequencing Center, Baylor College of Medicine, Houston, TX, USA
6. Department of Pediatrics, Baylor College of Medicine, Houston, TX, USA
7. Texas Children's Hospital, Baylor College of Medicine, Houston, TX, USA
8. Department of Clinical Genetics, Karolinska University Hospital, Stockholm, Sweden

\* These authors contributed equally to this work

### ***Supplemental Files:***

#### Figures:

Figure S1. Breakpoint junction analysis confirms interruption of *NIPBL*

Figure S2. Breakpoint junctions and molecular signatures suggest chromothripsis event as underlying mechanism

Figure S3. Fluorescent in situ hybridization (FISH) of proband and parents.

Figure S4. Paternally inherited chromosomal rearrangement.

#### Tables:

Table S1. Primers designed to amplify specific breakpoint junctions

Table S2. Single nucleotide polymorphisms (SNPs) and primers tested to determine parental origin of rearrangement allele

Table S3. Chromosomal segments as delineated by breakpoint junctions (*provided separately in xls format*)

Table S4. Paternally inherited duplication: breakpoint junctions

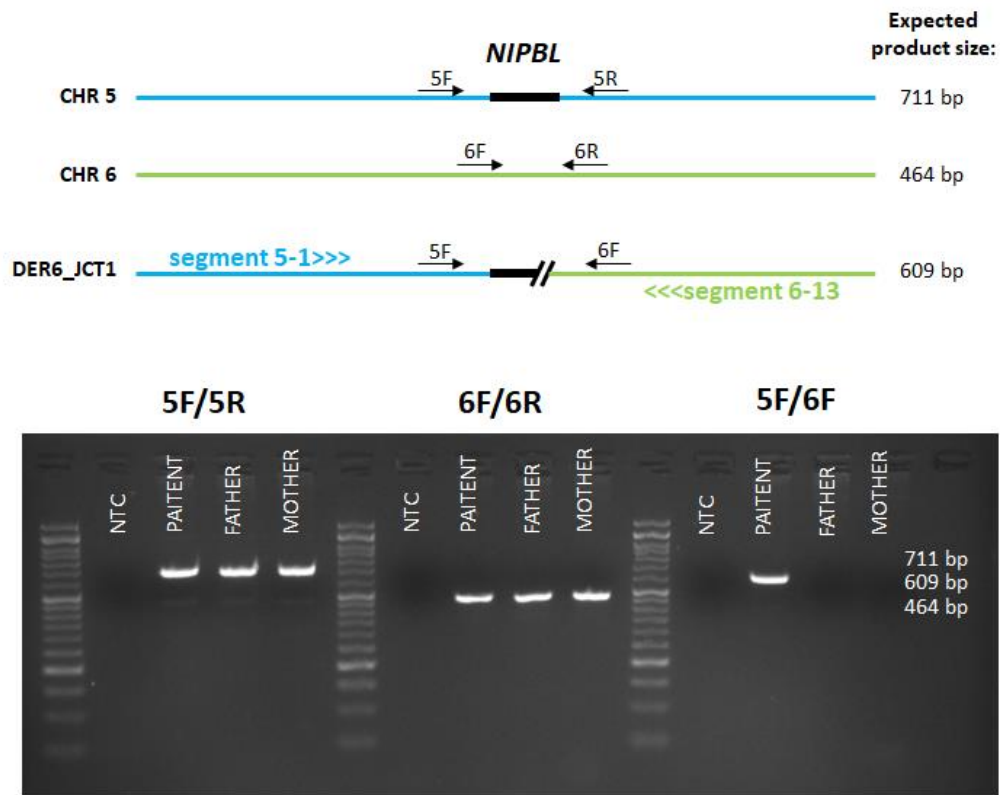

**Figure S1. Breakpoint junction analysis confirms interruption of *NIPBL*.** Primers were designed to amplify the wild-type alleles on chromosome 5 (primers 5F/5R) and chromosome 6 (primers 6F/6R). The breakpoint junction can be amplified by primers 5F and 6F, since the segment of chromosome 6 is in reverse orientation. The breakpoint junction is only amplified in the proband, confirming that the complex rearrangement occurred *de novo*.



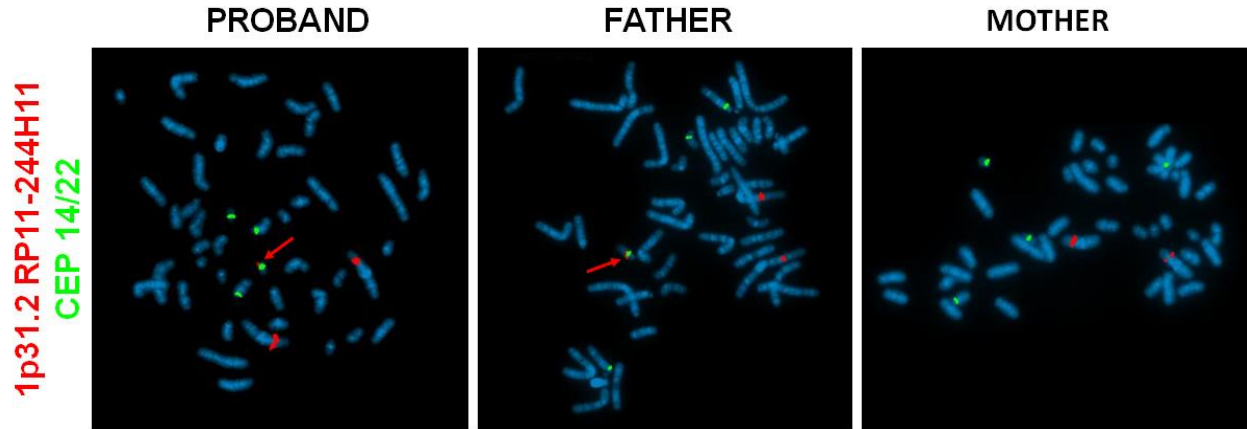

**Figure S3. Fluorescent in situ hybridization (FISH) of proband and parents.** Hybridization with probes targeting centromeres 14 and 22 (CEP 14/22, green) and 1p31.2 (red) confirmed localization of the duplication to chromosome 22 (red arrows) in the proband and father. The mother's sample was used as a control.

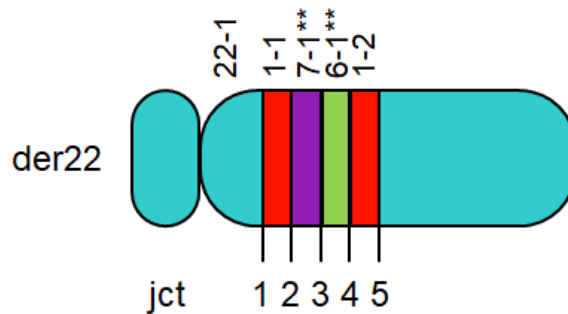

**Figure S4. Paternally inherited chromosomal rearrangement.** The rearrangement involves a ~56kb region originating from chromosome 1 (segments 1-1, 1-2), with interspersed segments from chromosomes 6 (segment 6-1\*\*) and 7 (segment 7-1\*\*). Double asterisks (\*\*) are used to differentiate these segments from those of the main chromothriptic event (Figure S2), when the same chromosomes are involved.

**Table S1. Primers designed to amplify specific breakpoint junctions**

| Primer name         | Forward primer          | Primer Name         | Reverse primer              | Size (bp) |
|---------------------|-------------------------|---------------------|-----------------------------|-----------|
| CHR5_control_F (5F) | TTCTGCCTGTAACCATGGAA    | CHR5_control_R (5R) | CCCCAACCTATCCATCCTCT        | 711       |
| CHR6_control_F (6F) | GGAATTTTCTGCAAAACCA     | CHR6_control_R (6R) | GGCTGTCAACACAGCAGAGA        | 464       |
| DER6_JCT1_NIPBL_F   | CHR5_control_F (5F)     | DER6_JCT1_NIPBL_R   | CHR6_control_F (6F)         | 609       |
| DER5_JCT7-8_F       | CCAGCACAAGATAACCAGCC    | DER5_JCT7-8_R       | AGCAAGAGTAGCATGGAGGT        | 685       |
| PAT_DUP_A_F         | CAGATTCAGACACCACATTTTGA | PAT_DUP_A_R         | AAAAATGAAAAGGACAGATCAAGT    | 563       |
| PAT_DUP_B_F         | CCCAGGAAAAGCAGATGAGA    | PAT_DUP_B_R         | TCAGGGATAATAAAAAGTTCAAACAGA | 564       |

**Table S2. Single nucleotide polymorphisms (SNPs) and primers tested to determine parental origin of rearrangement allele**

| Primer name      | Forward primer        | Reverse primer        | Size (bp) |
|------------------|-----------------------|-----------------------|-----------|
| SNP_RS1408258    | GCCCAGCTCATAGCAATAAAA | ACAGCAAGTACTGGAGCACA  | 397       |
| SNP_RS73718756   | GCACAAGGCTGTGAACAGAA  | AGCAAGAGTAGCATGGAGGTG | 825       |
| SNP_RS1398412976 | TGCACCACACCGAGTTTTTA  | TGCAGTTCCAAAAGTCGCTTA | 348       |

**Table S3. Chromosomal segments as delineated by breakpoint junctions (provided separately in xls format)****Table S4. Paternally inherited duplication: breakpoint junctions**

| Breakpoint junction | Genomic coordinate (prox end) | Genomic coordinate (distal end) | BL/INS/ MH | Size (bp) | Source                    |
|---------------------|-------------------------------|---------------------------------|------------|-----------|---------------------------|
| Der22_jct1          | 22:NA                         | 1:69119683                      | NA         | -         | NR                        |
| Der22_jct2          | 1:69119765                    | 7:38494198                      | INS        | 57        | Chr6: 166661181-166661157 |
| Der22_jct3          | 7:38494277                    | 6:166661187                     | INS        | 82        | NR                        |
| Der22_jct4          | 6:166668890                   | 1:69063596                      | BL         | -         | NR                        |
| Der22_jct5          | 1:69119677                    | 22:NA                           | INS        | -         | NR                        |
